# Supplementary material for: Chemistry, Occurrence, Properties, Applications, and Encapsulation of Carotenoids—A Review
Source: MDPI journal article supplement (doi:10.3390/plants12020313), 2023-01-09
Supplement: s1 [file s1]

**Table S1.** Carotenoid content in fruits and vegetables common in America.

| Source           | Scientific name                                  | Carotenoids (µg/g)  |            |                 |        |            |          | References |
|------------------|--------------------------------------------------|---------------------|------------|-----------------|--------|------------|----------|------------|
|                  |                                                  | β-carotene          | α-carotene | β-cryptoxanthin | Lutein | Zeaxanthin | Lycopene |            |
| Apple            |                                                  |                     |            |                 |        |            |          |            |
| Golden delicious | <i>Malus domestica</i>                           | 1.40                | -          | -               | 0.71   | 0.02       | -        | [3]        |
| Gala             |                                                  | 0.17                | -          | -               | 0.06   | 0.01       | -        |            |
| Apricot          | <i>Prunus armeniaca</i>                          | 170.00              | -          | 0.73            | 0.09   | 2.70       | -        | [3]        |
| Arugula          | <i>Eruca sativa</i>                              | 79.60               | 2.80       | -               | 74.40  | 0.06       | -        | [3]        |
| Banana           | <i>Musa paradisiaca</i>                          | 0.66                | 0.18       | -               | 0.04   | -          | -        | [3]        |
| Banana           | <i>Musa acuminata</i>                            | 8.38                | 8.62       | -               | 0.90   | -          | -        | [3]        |
| Black sapote     | <i>Diospyros digyna</i>                          | 79.90               | -          | -               | -      | -          | -        | [22]       |
| Broccoli         | <i>Brassica oleracea</i><br><i>var. italiaca</i> | 11.38               | -          | 0.15            | 28.05  | -          | -        | [3]        |
| Brussels sprout  | <i>Brassica oleracea</i><br><i>var. gemmiera</i> | 0.72                | -          | 11.63           | 11.63  | -          | -        | [3]        |
| Carrot           | <i>Daucus carota</i>                             | 53.60               | 45.00      | -               | 1.50   | -          | -        | [3]        |
|                  |                                                  | 47.5                | 47.1       | -               | -      | -          | -        | [23]       |
| Cashew           | <i>Anacardium occidentale</i>                    | 139.90 <sup>a</sup> | -          | -               | -      | -          | -        | [22]       |
| Cassava          | <i>Manihot esculenta</i>                         | 7.28                | 0.08       | 0.14            | 0.38   | -          | -        | [24]       |
| Cauliflower      | <i>Brassica oleracea</i><br><i>var. botrytis</i> | 0.22                | -          | 0.15            | 0.28   | -          | -        | [3]        |
| Coriander        | <i>Coriandrum sativum</i>                        | 586.10              | -          | -               | -      | -          | -        | [3]        |
| Dragon fruit     | <i>Hylocereus undatus</i>                        | 29.30 <sup>a</sup>  | -          | -               | -      | -          | -        | [22]       |
| Eggplant         | <i>Solanum melongena</i>                         | 0.18                | -          | -               | 0.71   | -          | -        | [23]       |
| Grape            | <i>Vitis vinifera</i>                            | 0.23                | -          | -               | 0.47   | -          | -        | [3]        |
| Guava            | <i>Psidium guajava</i>                           | 2.00                | -          | -               | 2.10   | -          | 45.30    | [3]        |

| Source                | Scientific name                                  | Carotenoids (µg/g)  |            |                 |                   |            |          | References |
|-----------------------|--------------------------------------------------|---------------------|------------|-----------------|-------------------|------------|----------|------------|
|                       |                                                  | β-carotene          | α-carotene | β-cryptoxanthin | Lutein            | Zeaxanthin | Lycopene |            |
| Kale                  | <i>Brassica oleracea</i><br><i>var. acephala</i> | 44.00               | -          | 0-21            | 65.22             | -          | -        | [3]        |
| Kiwifruit<br>(golden) | <i>Actinidia chinensis</i>                       | 11.70 <sup>a</sup>  | -          | -               | -                 | -          | -        | [25]       |
|                       |                                                  | 13.90 <sup>a</sup>  | -          | -               | -                 | -          | -        |            |
| Lettuce               | <i>Lactuca sativa</i>                            | 14.90               | -          | -               | 13.50             | -          | -        | [3]        |
| Jackfruit             | <i>Artocarpus</i><br><i>heterophyllus</i>        | 0.61                | 0.06       | 0.05            | 1.57 <sup>b</sup> | -          | -        | [26]       |
| Jocote                | <i>Spondias purpurea</i>                         | 171.60 <sup>a</sup> | -          | -               | -                 | -          | -        | [22]       |
| Mamey                 | <i>Pouteria sapota</i>                           | 37.64               | -          | -               | 0.87              | -          | -        | [4]        |
|                       |                                                  | 361.20 <sup>a</sup> | -          | -               | -                 | -          | -        | [22]       |
| Mango                 | <i>Mangifera indica</i>                          | -                   | -          | -               | 31.70             | 1.50       | -        | [3]        |
| Melon                 | <i>Cucumis melo</i>                              |                     |            |                 |                   |            |          |            |
| Orange flesh          |                                                  | 55.20               | -          | 2.77            | 1.67              | -          | -        | [27]       |
| Green flesh           |                                                  | 5.06                | -          | 0.27            | 4.84              | -          | -        |            |
| Nance                 | <i>Byrsonima</i><br><i>crassifolia</i>           | 145.40 <sup>a</sup> | -          | -               | -                 | -          | -        | [22]       |
| Okra                  | <i>Abelmoschus</i><br><i>esculentus</i>          | 1.93                | -          | -               | 8.98              | -          | 0.19     | [23]       |
| Orange                | <i>Citrus x sinensis</i>                         | 0.21                | 0.11       | 1.86            | 0.61              | -          | -        | [28]       |
| Papaya                | <i>Carica papaya</i>                             | -                   | -          | -               | 237.00            | 14.10      | -        | [3]        |
| Passion fruit         |                                                  |                     |            |                 |                   |            |          |            |
| Yellow pulp           | <i>Passiflora edulis</i>                         | 13.34               | 0.86       | 2.54            | 0.44              | 0.65       | -        | [29]       |
| Purple pulp           |                                                  | 1.72                | 0.68       | 0.31            | 0.11              | 0.07       | -        |            |
| Orange pulp           |                                                  | 7.45                | -          | -               | 1.05              | 0.91       | 4.40     |            |
| Peach                 | <i>Prunus persica</i>                            | 9.30                | -          | 1.60            | -                 | 1.10       | -        | [3]        |
| Pepper                |                                                  |                     |            |                 |                   |            |          |            |
| Green                 | <i>Capsicum annuum</i>                           | 17.50               | -          | -               | -                 | -          | -        | [18]       |

| Source               | Scientific name                   | Carotenoids (µg/g) |            |                 |        |            |               | References |
|----------------------|-----------------------------------|--------------------|------------|-----------------|--------|------------|---------------|------------|
|                      |                                   | β-carotene         | α-carotene | β-cryptoxanthin | Lutein | Zeaxanthin | Lycopene      |            |
| Green                |                                   | 4.30               | -          | -               | 12.30  | -          | -             | [19]       |
| Red                  |                                   | 16.30              | -          | -               | 3.50   | -          | -             | [19]       |
| Red                  |                                   | 27.30              | -          | 5.90            | -      | 36.10      | -             | [30]       |
| Orange               |                                   | 12.30              | -          | 11.20           | 283.90 | 1513.90    | -             | [30]       |
| Yellow               |                                   | 3.00               | -          | 4.30            | 210.80 | 22.20      | -             | [30]       |
| Pepper<br>(Habanero) |                                   |                    |            |                 |        |            |               |            |
| Orange               | <i>Capsicum chinense</i>          | -                  | -          | -               | 6.87   | 0.25       | -             | [30]       |
| Yellow               |                                   | 0.33               | -          | -               | 0.90   | 3.55       | -             | [30]       |
| Pineapple            | <i>Ananas comusus</i>             | 9.90               | -          | -               | -      | -          | -             | [3]        |
| Pitanga              | <i>Eugenia uniflora</i>           | 2.90               | -          | 16.00           | -      | -          | 166.00        | [20]       |
| Plum                 | <i>Prunus domestica</i>           | 0.4                | -          | 0.1             | 1.2    | -          | -             | [19]       |
| Pumpkin              | <i>Cucurbita maxima</i>           | 172.20             | 39.90      | -               | -      | -          | -             | [3]        |
| Spinach              | <i>Spinacia oleracea</i>          | 365.30             | -          | -               | 775.80 | 15.10      | -             | [3]        |
| Sweet potato         |                                   |                    |            |                 |        |            |               |            |
| Orange               |                                   | 365.03             | 16.16      | -               | 0.91   | -          | -             |            |
| Yellow               | <i>Ipomoea batatas</i>            | 117.00             | 8.61       | -               | -      | 5.44       | -             | [31]       |
| Purple               |                                   | 113.86             | -          | -               | -      | -          | -             |            |
| White                |                                   | 90.95              | 3.30       | -               | -      | 20.47      | -             |            |
| Tomato               | <i>Lycopersicum<br/>sculentum</i> | 16.10              | -          | -               | -      | -          | 19.40 - 46.80 | [18,19]    |
| Welsh onion          | <i>Allium fistulosum</i>          | 29.9               | -          | -               | 48.5   | -          | -             | [19]       |
| Yellow corn          | <i>Zea mays</i>                   | -                  | -          | 1.70            | 13.10  | 6.20       | -             | [3]        |
| Zucchini             | <i>Cucurbita pepo</i>             | -                  | -          | -               | 172.00 | -          | 7.00          | [3]        |

<sup>a</sup> Total carotenoid content quantified as µg of β-carotene/g. <sup>b</sup> Lutein + zeaxanthin content.
