# Supplementary material for: Chemistry, Occurrence, Properties, Applications, and Encapsulation of Carotenoids—A Review
Source: MDPI journal article supplement (doi:10.3390/plants12020313), 2023-01-09
Supplement: s1 [file s1]

**Table S3.** Examples of carotenoids encapsulated by nanoencapsulation techniques.

| Carotenoid  | Deliver system                                                                                 | Surfactant                           | Encapsulation method                                              | Particle size (nm)                                                                         | EE (%)                                                                                    | Storage conditions                                                               | Carotenoid retention after storage (%) | Reference |
|-------------|------------------------------------------------------------------------------------------------|--------------------------------------|-------------------------------------------------------------------|--------------------------------------------------------------------------------------------|-------------------------------------------------------------------------------------------|----------------------------------------------------------------------------------|----------------------------------------|-----------|
| Astaxanthin | o/w emulsion (corn oil)                                                                        | SC                                   | Microfluidization (12,000 psi 5 cycles)                           | 230.62 ± 1.34                                                                              | 79.80 ± 3.10                                                                              | 15 days at different temperatures, pH and [NaCl] under light and dark conditions | NR                                     | [113]     |
| Astaxanthin | Liposome                                                                                       | SPC and cholesterol                  | High intensity ultrasound (100 W for 4 min in ice)                | 80.62 ± 4.52                                                                               | 97.68 ± 0.35                                                                              | 15 days at 4 and 25 °C under dark conditions                                     | 82.29 (4°C)<br>61.32 (25°C)            | [114]     |
| Astaxanthin | Liposome                                                                                       | SPC and cholesterol                  | High intensity ultrasound (100 W for 4 min in ice)                | 80.31 ± 1.80                                                                               | 97.49 ± 0.27                                                                              | ND                                                                               | ND                                     | [114]     |
| Astaxanthin | NLC: lipid phase (astaxanthin, GB, lecithin and oleic acid)                                    | Tween 80 and lecithin                | High intensity ultrasound                                         | 94                                                                                         | ~ 90.00                                                                                   | Different pH, [NaCl] and temperature conditions                                  | ND                                     | [115]     |
| β-carotene  | o/w emulsion (corn oil)                                                                        | Tween 20                             | Microfluidization (4,000 psi 3 times)                             | 210 (small)<br>380 (medium)                                                                | ND                                                                                        | ND                                                                               | ND                                     | [116]     |
| β-carotene  | o/w emulsion (palm oil)                                                                        | WPI                                  | Microfluidization (15,000 psi 7 cycles)                           | 168.43 ± 7.68                                                                              | NR                                                                                        | 6 weeks at 25 and 55 °C under dark conditions                                    | 69.36 (25°C), 48.56 (55°C)             | [117]     |
|             | o/w emulsion (coconut oil)                                                                     |                                      |                                                                   | 172.70 ± 1.91                                                                              | NR                                                                                        |                                                                                  | 63.81 (25°C), 43.41 (55°C)             |           |
|             | o/w emulsion (fish oil)                                                                        |                                      |                                                                   | 184.97 ± 0.86                                                                              | NR                                                                                        |                                                                                  | 49.58 (25°C), 29.35 (55°C)             |           |
|             | o/w emulsion (corn oil)                                                                        |                                      |                                                                   | 176.80 ± 0.44                                                                              | NR                                                                                        |                                                                                  | 54.91 (25°C), 33.60 (55°C)             |           |
| β-carotene  | o/w emulsion (corn oil)                                                                        | Tween 20                             | High-pressure homogenization (172 MPa 8 times)                    | 173                                                                                        | ND                                                                                        | ND                                                                               | ND                                     | [118]     |
| β-carotene  | o/w emulsion (corn oil)                                                                        | Tween 80                             | High-pressure homogenization (100 MPa 3 cycles)                   | 226.00 ± 7.00                                                                              | ND                                                                                        | ND                                                                               | ND                                     | [116]     |
| β-carotene  | Mix of alcoholic (zein and β-carotene) and aqueous (surfactants) solutions                     | Zein, Tween 80 and pluronic F-68     | Phase separation and freeze drying                                | 81.30 ± 4.20 (zein 1 mg/mL)<br>92.30 ± 3.60 (zein 2 mg/mL)<br>131.70 ± 6.10 (zein 3 mg/mL) | 55.30 ± 1.90 (zein 1 mg/mL)<br>68.20 ± 2.30 (zein 2 mg/mL)<br>68.80 ± 3.10 (zein 3 mg/mL) | ND                                                                               | ND                                     | [119]     |
| β-carotene  | SLN: lipid phase A (β-carotene, GMS and gelucire 50/13) and lipid phase B (phospholipid S-100) | GMS, Tween 80 and phospholipid S-100 | Homogenization (30 min at 10,000 rpm) combined with freeze drying | 203.00 ± 7.23                                                                              | 68.30 ± 3.40                                                                              | 3 months at 5, 25 and 40 °C                                                      | > 60                                   | [120]     |
| β-carotene  | o/w emulsion                                                                                   | BSA                                  |                                                                   | 744.00 ± 22.00                                                                             | 90.10 ± 1.20                                                                              |                                                                                  | ~ 40                                   | [121]     |

|                                                  |                                                                              |                            |                                                                              |                                                        |                                                  |                                                                                 |                                                                                                                  |       |
|--------------------------------------------------|------------------------------------------------------------------------------|----------------------------|------------------------------------------------------------------------------|--------------------------------------------------------|--------------------------------------------------|---------------------------------------------------------------------------------|------------------------------------------------------------------------------------------------------------------|-------|
|                                                  | o/w emulsion                                                                 | GA                         | High-pressure homogenization                                                 | 199.00 ± 6.00                                          | 95.10 ± 1.50                                     | 5 weeks at 25°C under dark conditions                                           | ~ 45                                                                                                             |       |
|                                                  | o/w emulsion                                                                 | BSA-GA                     | (1 <sup>st</sup> stage 70 Mpa, 2 <sup>nd</sup> stage 7 MP 3 cycles)          | 221.00 ± 5.00                                          | 94.40 ± 0.70                                     |                                                                                 | ~ 80                                                                                                             |       |
| Carotenoids                                      | o/w emulsion in CS solution with TPP (crosslinking agent)                    | Tween 80                   | Homogenization-ionic gelation (5000 rpm for 30 min) and freeze drying        | 317                                                    | 89.09                                            | ND                                                                              | ND                                                                                                               | [122] |
| Carrot puree ( $\alpha$ - and $\beta$ -carotene) | o/w emulsion (corn/olive oil)                                                | Tween 80                   | High-pressure homogenization (100 MPa 3 cycles)                              | 279.00 ± 1.00 (olive oil)<br>249.00 ± 28.00 (corn oil) | ND                                               | ND                                                                              | ND                                                                                                               | [116] |
| Crocin                                           | o/w emulsion                                                                 | Alginate and CS            | High-intensity ultrasound (20 kHz for 3 min on ice) and ionic gelation       | 236                                                    | 38.16                                            | ND                                                                              | ND                                                                                                               | [123] |
| Lutein                                           | CS, DS and lutein solution mixed with PEG400 and EDC (co-crosslinking agent) | PEG400                     | Polyelectrolyte complexation and homogenization (15 min at 8,000 rpm)        | 428.00 ± 1.00 (no P/E)<br>454.00 ± 7.00 (with P/E)     | 60.71 ± 0.55 (no P/E)<br>76.17 ± 1.30 (with P/E) | 4 weeks at 4°C (R) and room temperature (RT)                                    | 76.90 ± 22.40 (R-no P/E)<br>12.50 ± 2.00 (RT-no P/E)<br>87.10 ± 15.90 (R-with P/E)<br>11.30 ± 1.20 (RT-with P/E) | [124] |
| Lutein                                           | o/w emulsion                                                                 | WPI                        | High-intensity ultrasound (amplitude 40% for 5 min on ice)                   | 209.00 ± 9.10                                          | ND                                               | 4 weeks at 5, 25 and 37 °C                                                      | ~ 95                                                                                                             | [125] |
| Lycopene                                         | Mix of lipid phase (lycopene, GPS or GB) and aqueous phase                   | Tween 80 and Poloxamer 407 | Homogenization (12,000 rpm for 30 min at 70°C, 19,000 rpm for 10 min)        | 125.00 ± 3.89 (GPS)<br>129.00 ± 1.83 (GB)              | 98.40 ± 0.50 (GPS)<br>93.10 ± 0.60 (GB)          | 3 months at 4°C                                                                 | ND                                                                                                               | [126] |
| Lycopene                                         | Liposome                                                                     | Phospholipids              | NR                                                                           | ND                                                     | 71.90                                            | 3 h at 37°C under different pH (6.5, 7.4, 8.0 and 9.0)                          | 58.20 ± 0.40 (6.5)<br>53.90 ± 0.00 (7.4)<br>44.40 ± 0.20 (8.0)<br>20.90 ± 0.17 (9.0)                             | [127] |
| Paprika oleoresin                                | o/w emulsion (canola oil and oleoresin)                                      | Tween 20                   | Microfluidization (30 MPa 11 cycles) combined with nano spray drying (110°C) | ND                                                     | 98.50 ± 2.10                                     | 30 days at 25, 35 and 45 °C under a <sub>w</sub> =0.108, 0.318, 0.529 and 0.743 | 50 (25°C and a <sub>w</sub> =0.529)                                                                              | [128] |
| Paprika oleoresin                                | o/w emulsion                                                                 | Tween 40                   | High intensity ultrasound (250 W, 24kHz, amplitude 65% for 10 min on ice)    | 39.00 ± 0.03                                           | ND                                               | ND                                                                              | ND                                                                                                               | [129] |

BSA: bovine serum albumin. CS: chitosan. DS: dextran sulfate. GB: glyceryl behenate. GMS: glyceryl monostearate. GPS: glyceryl palmitostearate. EE: encapsulation efficiency. PBS: phosphate buffer solution. ND: not determined. NLC: nanostructured lipid carrier. NR: not reported. SCP: soybean phosphatidyl coline. SLN: solid lipid nanoparticles. TPP: tripolyphosphate. WPI: whey protein isolate.
