# Supplementary material for: Chemistry, Occurrence, Properties, Applications, and Encapsulation of Carotenoids—A Review
Source: Plants (Basel). 2023 Jan 9;12(2):313. doi: 10.3390/plants12020313 (PMC9865331; doi:10.3390/plants12020313)
Supplement: Supplementary file 1 [file plants-12-00313-s001.zip]

Archive with 6 entries (6 files):
- Fig.S1 R1 (part 1).jpg
- Fig.S1 R1 (part 2).png
- Fig.S1 R1 (part 3).png
- Table S1.pdf
- Table S2.pdf
- Table S3.pdf
